# Supplementary material
Source: publisher site journal article supplement (https://www.dovepress.com/article/394712)

Supplementary Material

**Anticancer evaluation of methoxy poly(ethylene glycol)-*b*-poly(caprolactone) polymeric micelles encapsulating fenbendazole and rapamycin in ovarian cancer**

Yu Been Shin1

Ju-Yeon Choi3

Dae Hwan Shin1

Jeong-Won Lee2,3

1College of Pharmacy, Chungbuk National University, Cheongju, 28160, Republic of Korea; 2Department of Obstetrics and Gynecology, Samsung Medical Center, Sungkyunkwan University School of Medicine, Seoul, South Korea; 3Research Institute for Future Medicine, Samsung Medical Center, Sungkyunkwan University School of Medicine, Seoul, South Korea;

Correspondence: Dae Hwan Shin

College of Pharmacy, Chungbuk National University, Osongsaengmyeong 1-ro, Osong-eup, Heungdeok-gu, Cheongju 28160, Republic of Korea.

Phone: +82 43 261 2820

Fax: +82 43 268 2732

E-mail: dshin@chungbuk.ac.kr
Jeong-Won Lee

Department of Obstetrics and Gynecology, Samsung Medical Center

Sungkyunkwan University School of Medicine

81, Irwon-ro, Gangnam-gu, Seoul, South Korea, Zip: 06351

Phone: +82-2-3410-1382

Fax: +82-2-3410-0630

Email: garden.lee@samsung.com

**Figure S1** In vitro cytotoxicity assay of HeyA8 cells treated with (A) fenbendazole:rapamycin=1:1, (B) fenbendazole:rapamycin=2:1, (C) fenbendazole:rapamycin=1:4 and (D) fenbendazole:rapamycin=4:1.


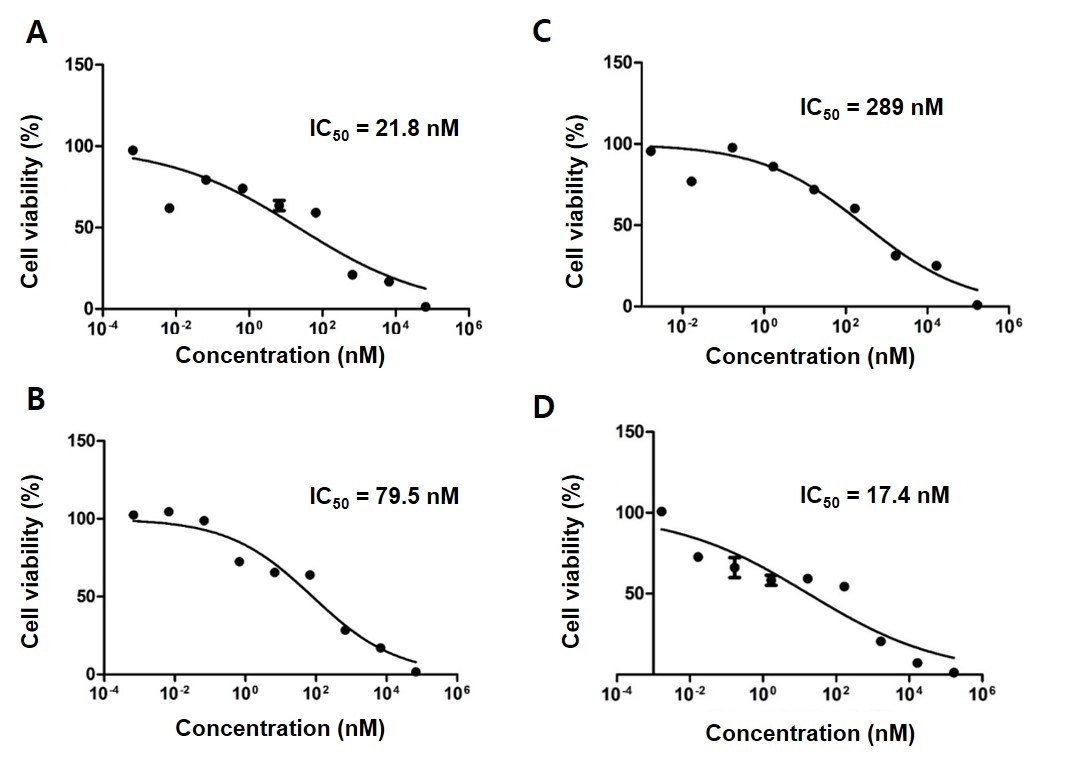


**Figure S2** CI value of fenbendazole and rapamycin at various molar ratios based on fenbendazole.

**Abbreviations:** CI, combination index.
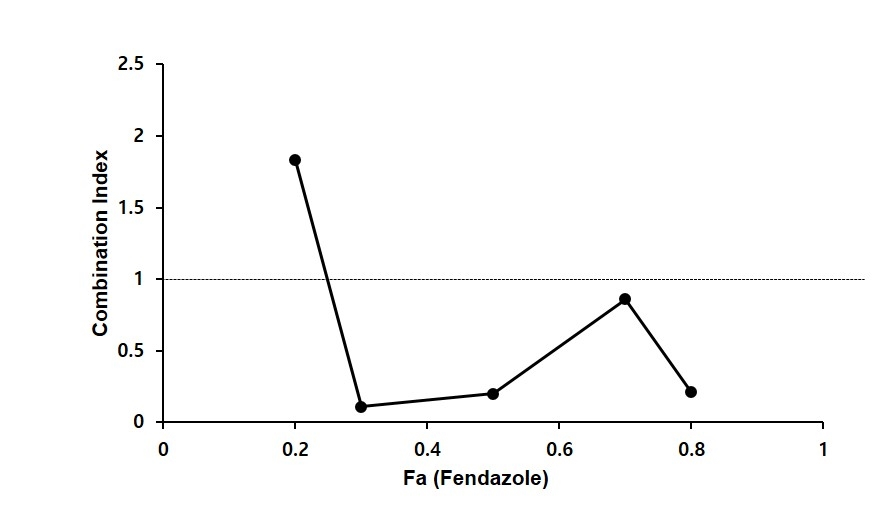

Supplement: Supplementary file 1 [file get_supplementary_file.php]
